# Supplementary material for: Reverse Microbiomics: A New Reverse Dysbiosis Analysis Strategy and Its Usage in Prediction of Autoantigens and Virulent Factors in Dysbiotic Gut Microbiomes From Rheumatoid Arthritis Patients
Source: Front Microbiol. 2021 Feb 25;12:633732. doi: 10.3389/fmicb.2021.633732 (PMC7947680; doi:10.3389/fmicb.2021.633732)
Supplement: Supplementary Table 6 — 24 ABC transporter adhesin proteins and two related proteins in B. dentium but not present in B. bifidum. [file Table_6.xlsx]

## Sheet: Sheet1
Supplementary Table 6 24 ABC transporter adhesin proteins and two related proteins in B. dentium but not present in B. bifidum.
NO	Gene ID	Protein Name	Localization	COG IDs	CDD ID	annotation
1	EFM41527.1	ABC transporter, solute-binding protein	UN	GPK	354813	uptake of a variety of soluble substrates such as phosphate, sulfate, polysaccharides, lysine/arginine/ornithine, and histidine.
2	EFM41333.1	ABC transporter, solute-binding protein	EX	EGP	354813	uptake of a variety of soluble substrates such as phosphate, sulfate, polysaccharides, lysine/arginine/ornithine, and histidine.
3	EFM41129.1	carbohydrate ABC transporter substrate-binding protein	UN	GP	354813	uptake of a variety of soluble substrates such as phosphate, sulfate, polysaccharides, lysine/arginine/ornithine, and histidine
4	EFM40667.1	ABC transporter, solute-binding protein	UN	G	354813	uptake of a variety of soluble substrates such as phosphate, sulfate, polysaccharides, lysine/arginine/ornithine, and histidine
5	EFM40447.1	ABC transporter, solute-binding protein	UN	G	354813	uptake of a variety of soluble substrates such as phosphate, sulfate, polysaccharides, lysine/arginine/ornithine, and histidine
6	EFM40553.1	ABC transporter, solute-binding protein	UN	G	354813	uptake of a variety of soluble substrates such as phosphate, sulfate, polysaccharides, lysine/arginine/ornithine, and histidine
7	EFM40564.1	ABC transporter, solute-binding protein	UN	G	354813	uptake of a variety of soluble substrates such as phosphate, sulfate, polysaccharides, lysine/arginine/ornithine, and histidine
8	EFM40538.1	ABC transporter, solute-binding protein	UN	GP	354813	uptake of a variety of soluble substrates such as phosphate, sulfate, polysaccharides, lysine/arginine/ornithine, and histidine.
9	EFM40775.1	ABC transporter, solute-binding protein	UN	GP	224567;304360	[224567]ABC-type glycerol-3-phosphate transport system, periplasmic component [Carbohydrate transport and metabolism]; [304360] uptake of a variety of soluble substrates such as phosphate, sulfate, polysaccharides, lysine/arginine/ornithine, and histidine.
10	EFM40465.1	ABC transporter, solute-binding protein	UN	G	224567;304360	[224567]ABC-type glycerol-3-phosphate transport system, periplasmic component [Carbohydrate transport and metabolism]; [304360] uptake of a variety of soluble substrates such as phosphate, sulfate, polysaccharides, lysine/arginine/ornithine, and histidine.
11	EFM40440.1	ABC transporter, solute-binding protein, partial	UN	GE	224567;304360	[224567]ABC-type glycerol-3-phosphate transport system, periplasmic component [Carbohydrate transport and metabolism]; [304360] uptake of a variety of soluble substrates such as phosphate, sulfate, polysaccharides, lysine/arginine/ornithine, and histidine.
12	EFM41054.1	ABC transporter, solute-binding protein	UN	GP	224567;304360	[224567]ABC-type glycerol-3-phosphate transport system, periplasmic component [Carbohydrate transport and metabolism]; [304360] uptake of a variety of soluble substrates such as phosphate, sulfate, polysaccharides, lysine/arginine/ornithine, and histidine.
13	EFM40528.1	ABC transporter, solute-binding protein	UN	G	224567；290152	[224567]ABC-type glycerol-3-phosphate transport system, periplasmic component [Carbohydrate transport and metabolism];
14	EFM42554.1	ABC transporter, solute-binding protein	UN	GP	224567;270303	ABC-type glycerol-3-phosphate transport system, periplasmic component [Carbohydrate transport and metabolism]
15	EFM40789.1	ABC transporter, solute-binding protein	UN	GP	224567	ABC-type glycerol-3-phosphate transport system, periplasmic component [Carbohydrate transport and metabolism]
16	EFM40803.1	ABC transporter, solute-binding protein	UN	G	224567	ABC-type glycerol-3-phosphate transport system, periplasmic component [Carbohydrate transport and metabolism]
17	EFM42419.1	ABC transporter, substrate-binding protein	UN	P	350990;238347;337328	ferric siderophores and metal ions such as Mn2+, Fe3+, Cu2+ and/or Zn2+.;ZinT (YodA) periplasmic lipocalin-like zinc-recruitment
18	EFM41039.1	receptor family ligand-binding protein	UN	E	350990;238347;337328	ferric siderophores and metal ions such as Mn2+, Fe3+, Cu2+ and/or Zn2+.;ZinT (YodA) periplasmic lipocalin-like zinc-recruitment
19	EFM41928.1	ABC transporter, substrate-binding protein, family 5	UN	EPKV	173853	import of nickel and peptides, and other closely related proteins.
20	EFM41927.1	ABC transporter, substrate-binding protein, family 5	UN	EP	173853	function in the import of nickel and peptides, and other closely related proteins.
21	EFM40815.1	receptor family ligand-binding protein	UN	EPTW	107263	involved in scavenging solutes from the environment.， uptake and efflux of a wide range of substrates across bacterial membranes, including amino acids, peptides, lipids and sterols, and various drugs.
22	EFM41049.1	sugar ABC transporter substrate-binding protein	UN	GKPT	107251	Periplasmic xylose-binding component of the ABC-type transport systems that belong to a family of pentose/hexose sugar-binding proteins of the type I periplasmic binding protein (PBP1) superfamily
23	EFM41148.1	ABC transporter, substrate-binding protein, family 3	UN	ETP	270248;278898	uptake of small soluble substrates in eubacteria and archaea.
24	EFM40959.1	ABC transporter permease	UN	VP	224280	Function unknown
25	EFM41009.1	ABC transporter, substrate-binding protein,family 3	UN	EPT	270225	involved in chemotaxis and uptake of nutrients and other small molecules from the extracellular space as a primary receptor.
26	EFM42117.1	ABC transporter, solute-binding protein	UN	GP	270451	uptake of small soluble substrates in eubacteria and archaea.
	Abbreviations:EX – Extracellular localization;UN -Unknown subcellular localization. [E]Amino acid transport and metabolism;[G]Carbohydrate transport and metabolism; [K]Transcription; [P]Inorganic ion transport and metabolism; [T]Signal transduction mechanisms; [V]Defense mechanisms; [W]Extracellular structures
